# Supplementary material for: Thymus vulgaris Essential Oil Protects Zebrafish against Cognitive Dysfunction by Regulating Cholinergic and Antioxidants Systems
Source: PubMed Central journal article supplement (PMC7694219; doi:10.3390/antiox9111083), 2020-11-04
Supplement: antioxidants-09-01083-s001.pdf [file antioxidants-09-01083-s001.pdf]

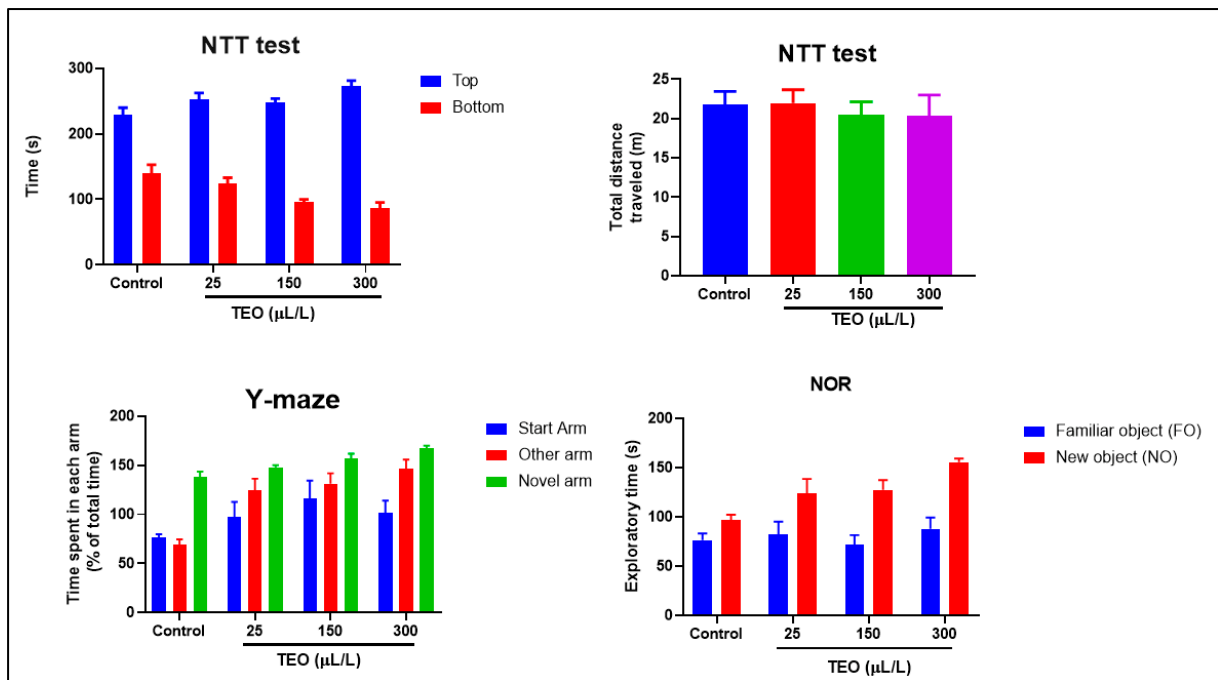

**Figure S1.** The effects of *Thymus vulgaris* essential oil (TEO: 25, 150, and 300 μL/L) on the time spent in top/bottom zone and total distance traveled by zebrafish in the NTT test, the time spent in the novel arm of the Y-maze test and the exploratory time of the novel object in the NOR test in the control groups.
